# Supplementary figures and images for: The St Thomas’ Hospital Emergency Department Homeless Health Initiative: improving the quality, safety and equity of healthcare provided for homeless patients attending the ED
Source: PubMed Central journal article supplement — BMJ Open Qual. 2020 Feb 12;9(1):e000820. doi: 10.1136/bmjoq-2019-000820 (PMC7047490; doi:10.1136/bmjoq-2019-000820), 2020-02-12

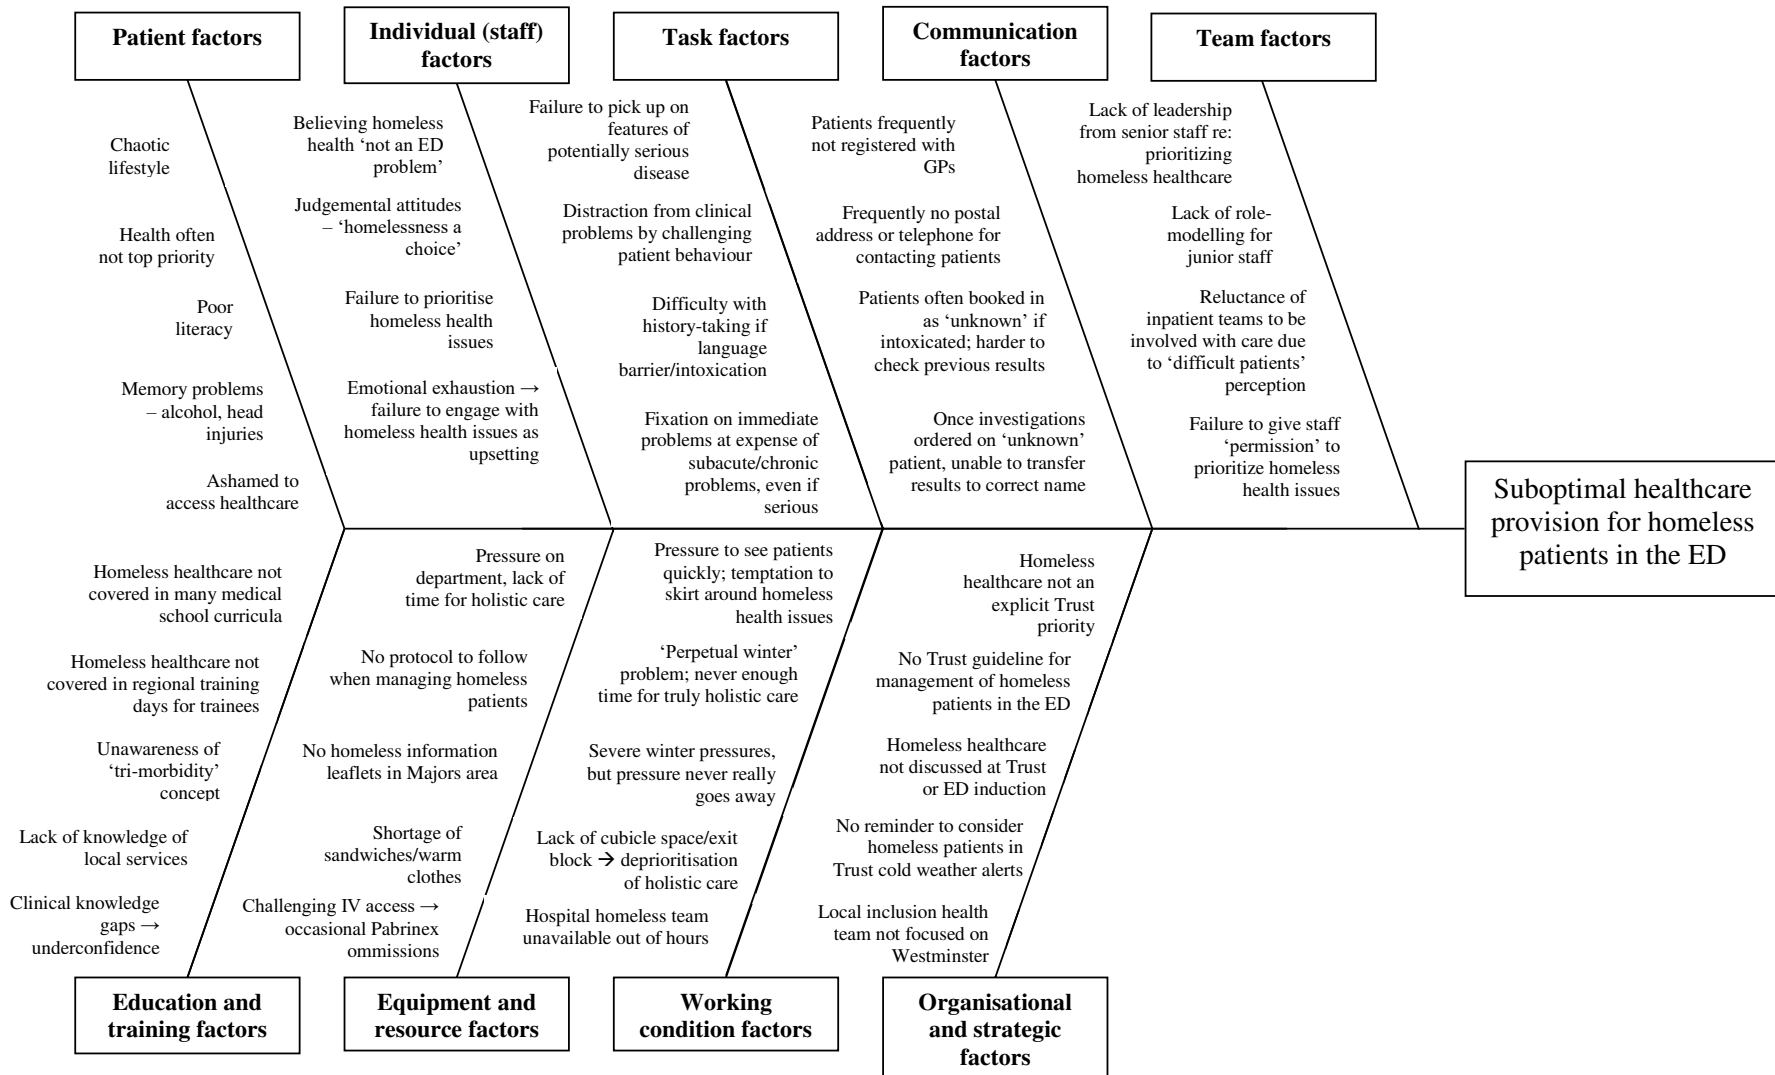

Supplement: bmjoq-2019-000820supp001.pdf [file bmjoq-2019-000820supp001.pdf]

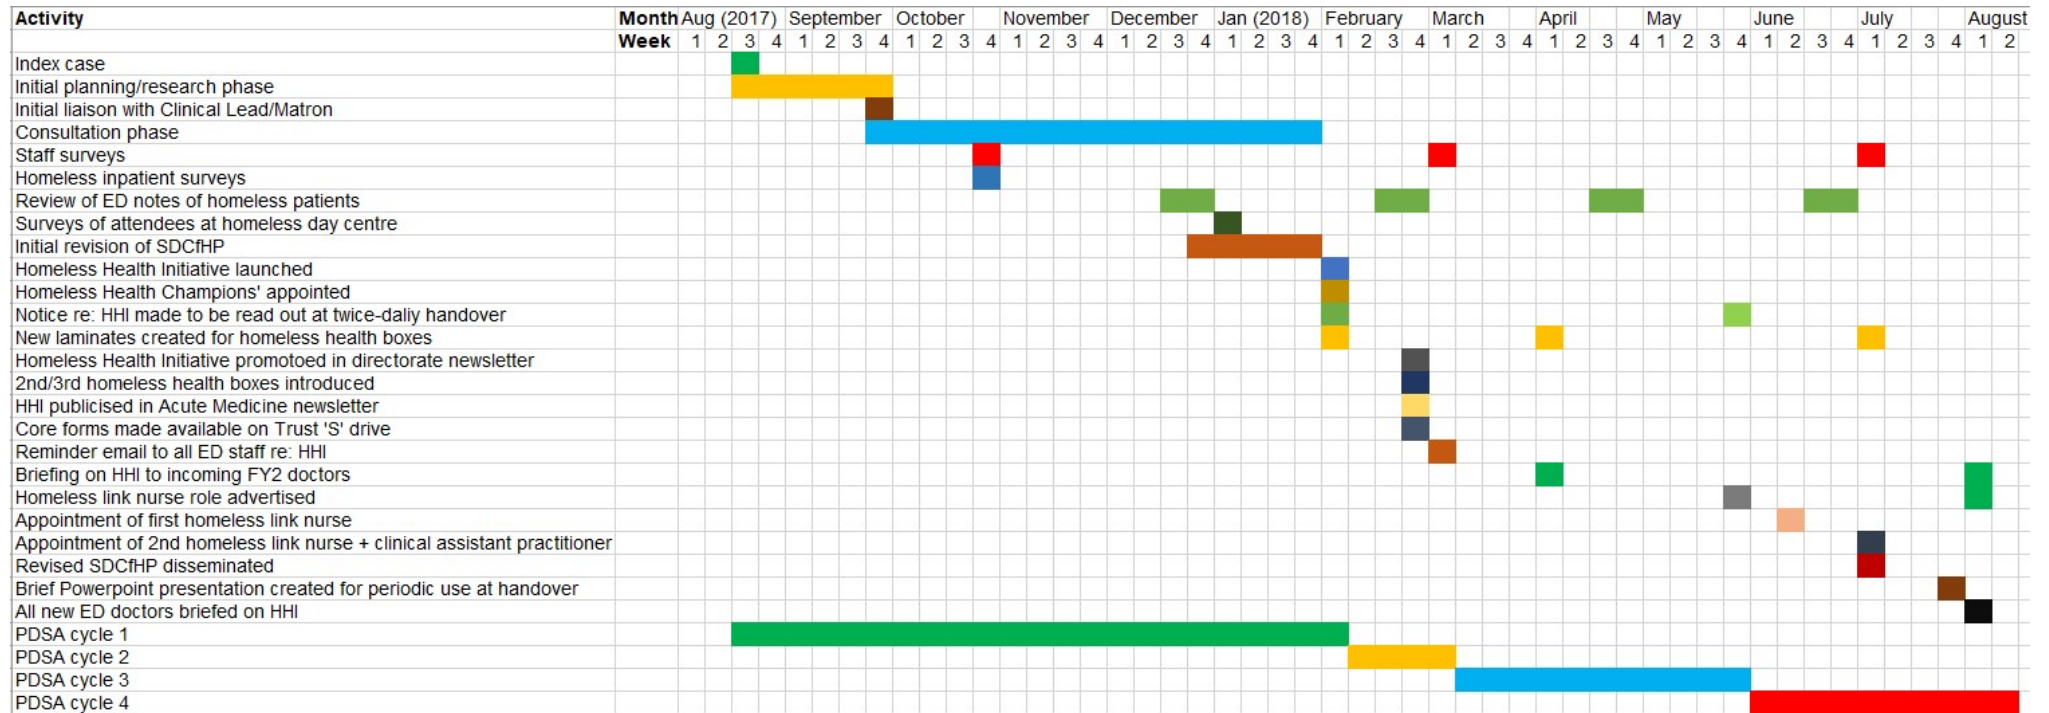

Supplement: bmjoq-2019-000820supp002.pdf [file bmjoq-2019-000820supp002.pdf]

# Homeless Friendly GP

## Lambeth

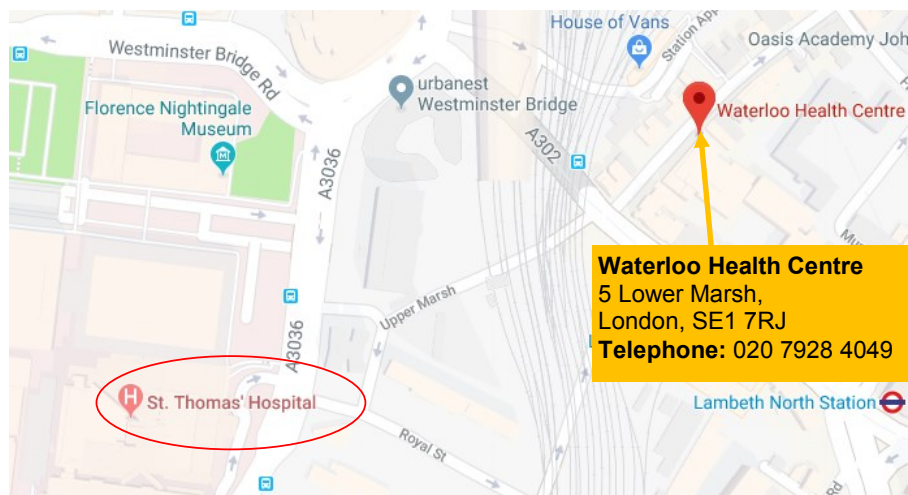

## Westminster

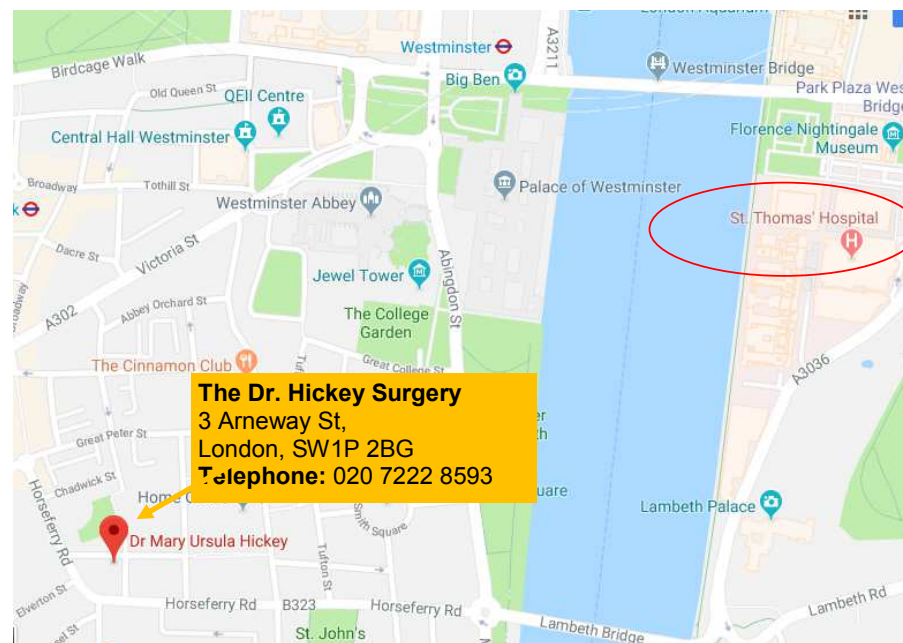

## Southwark

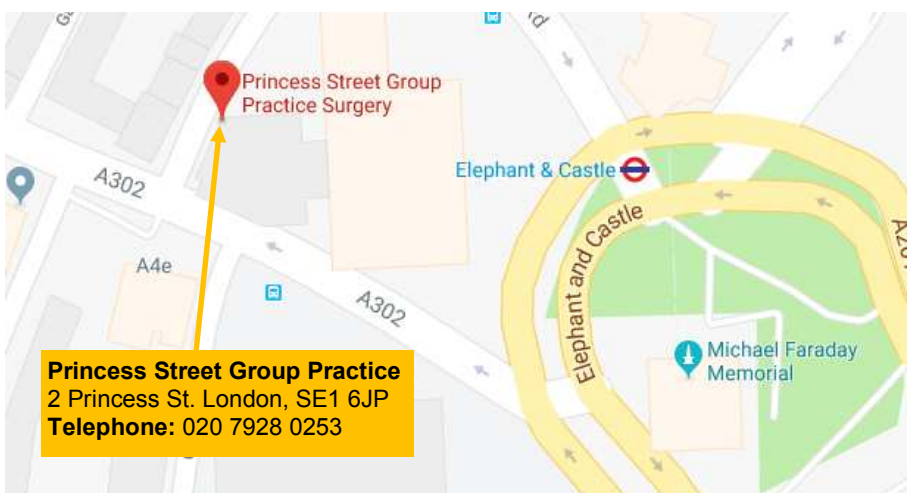

## Soho

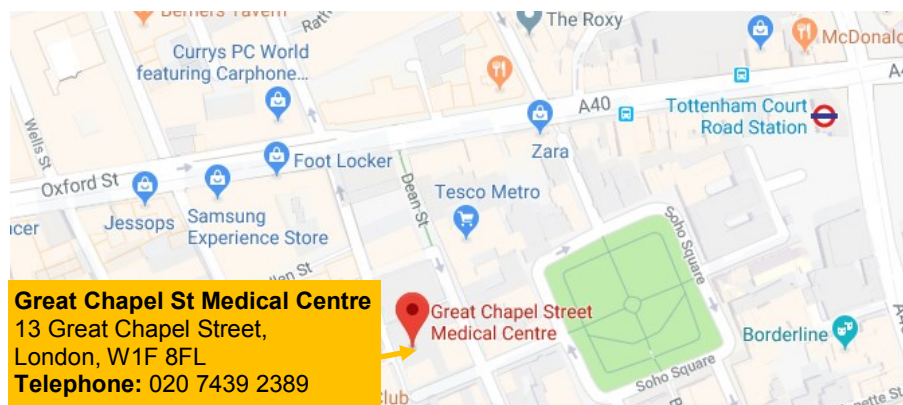

Supplement: bmjoq-2019-000820supp003.pdf [file bmjoq-2019-000820supp003.pdf]
